# Supplementary material
Source: Springer Nature journal article supplement (https://www.springermedizin.de/resource/supplementary/12967_2010_498_MOESM6_ESM.pdf/9576674)

**A**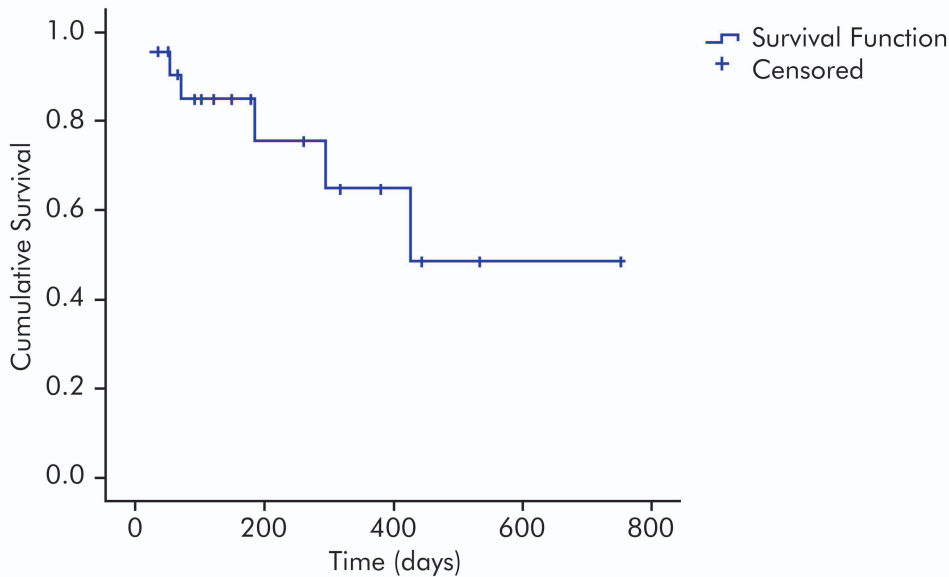**B**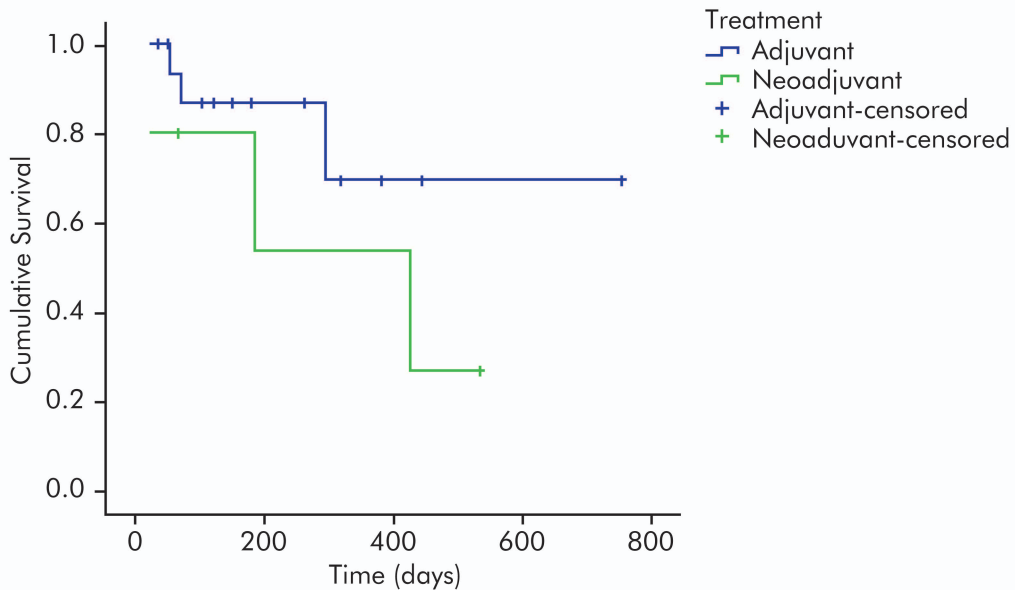

Supplement: MOESM6 [file 9576674]
